# Supplementary material for: Effect of Valproic Acid on Promoting the Differentiation of Human Embryonic Stem Cells Into Cholangiocyte-Like Cells
Source: PubMed Central journal article supplement (PMC10872666; doi:10.1093/stcltm/szad079), 2023-11-23
Supplement: szad079_suppl_supplementary_material.pdf [file szad079_suppl_supplementary_material.pdf]

**Effect of valproic acid on promoting the differentiation of human embryonic stem cells into cholangiocyte-like cells**

**Supplementary Figures**

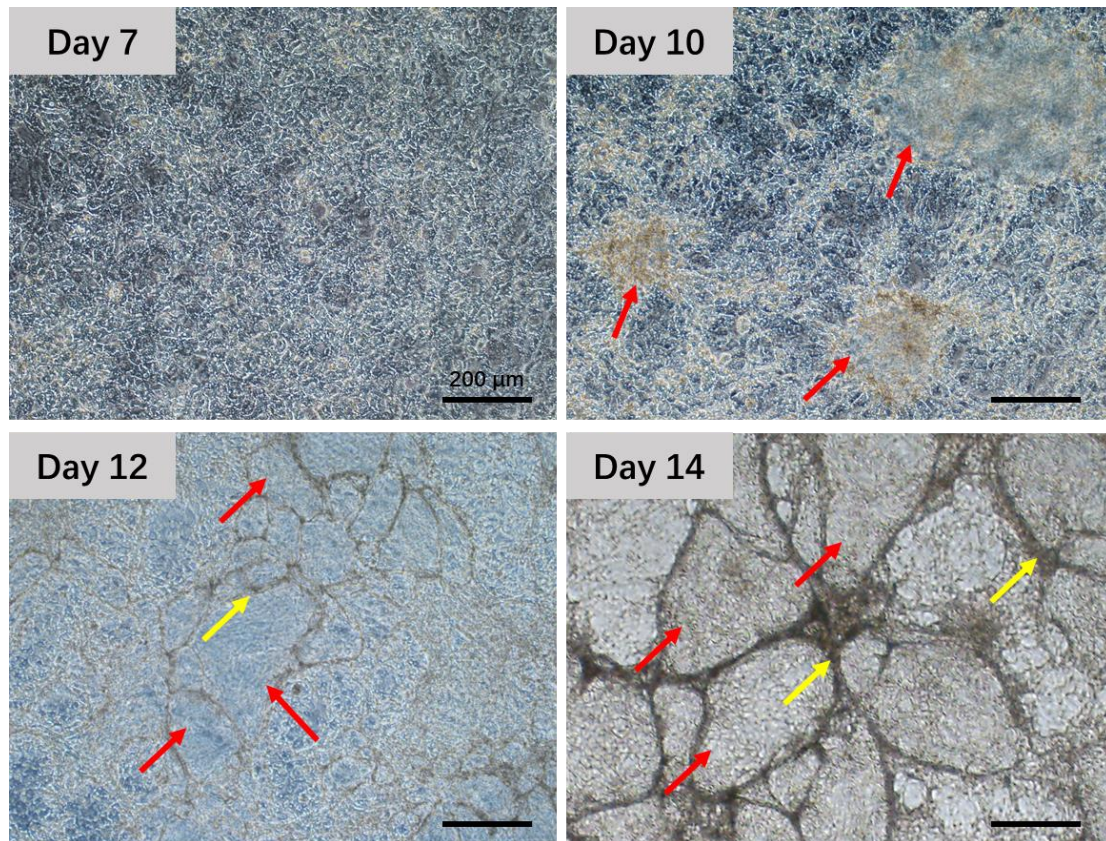

Supplementary Figure 1. Cystic and tubular structures increased during culture. Red arrow: cystic structure. Yellow arrow: tubular structure.

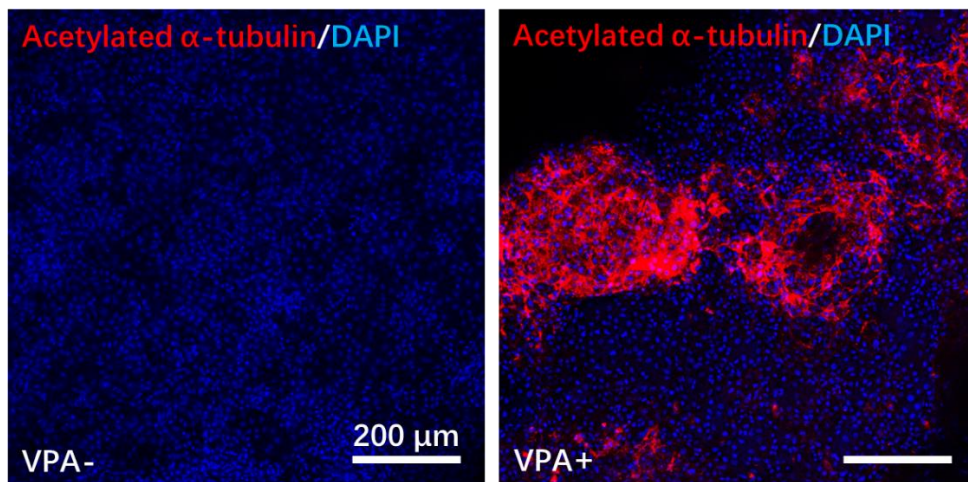

Supplementary Figure 2. Immunostaining of Acetylated  $\alpha$ -tubulin in differentiated cells with or without VPA treatment.

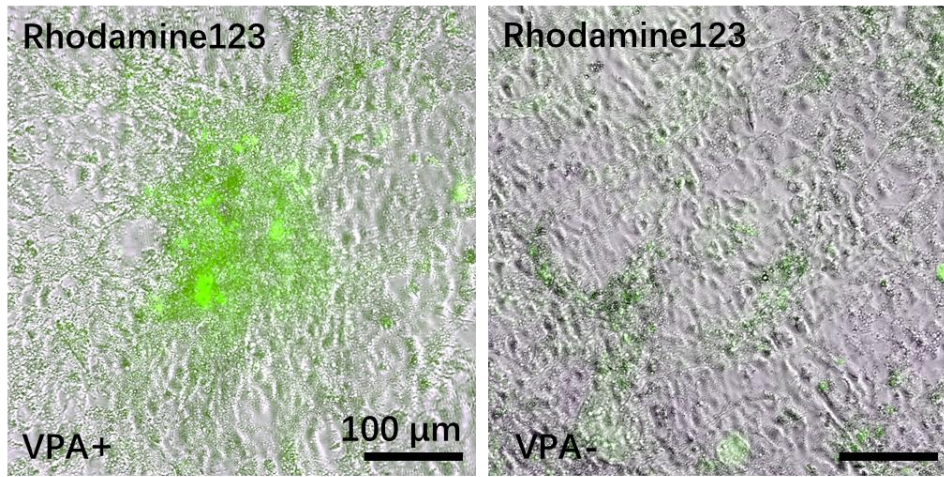

Supplementary Figure 3. The uptake of Rhodamine 123 in differentiated cells with or without VPA treatment.

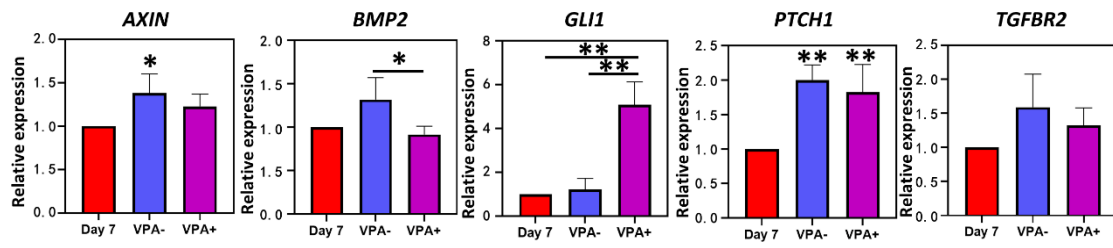

Supplementary Figure 4. Real-time PCR results of the expression of marker genes of BMP, Hedgehog, TGF- $\beta$  and Wnt signaling pathway. (n=3, \* indicates p < 0.05, \*\* indicates p < 0.01).

## Supplementary Tables

Supplementary Table 1. PCR primer used for the quantification of markers

| Gene                            | Forward (5'-3')         | Reverse (5'-3')         |
|---------------------------------|-------------------------|-------------------------|
| <i>OCT4</i>                     | CTTGAATCCCGAATGGAAAGGG  | GTGTATATCCCAGGGTGATCCTC |
| <i>FOXA2</i>                    | GCACTCGGCTTCCAGTATGC    | GCGTTCATGTTGCTCACGGA    |
| <i>HNF-4<math>\alpha</math></i> | GTACTIONCTGCAGATTTAGCC  | CTGTCCTCATAGCTTGACCT    |
| <i>AFP</i>                      | AAATGCGTTTCTCGTTGCTT    | GCCACAGGCCAATAGTTTGT    |
| <i>GAPDH</i>                    | ACAACCTTTGGTATCGTGGAAGG | GCCATCACGCCACAGTTTC     |
| <i>AE2</i>                      | TCCTCCCACCACATCCATCA    | CTCCTCAATGGTTCGGGGTTTC  |
| <i>AQP1</i>                     | TAACCTGCTCGGTCCTTTG     | AGTCGTAGATGAGTACAGCCAG  |
| <i>CFTR</i>                     | TGCCCTTCGGCGATGTTTTT    | GTTATCCGGGTCATAGGAAGCTA |
| <i>SSR2</i>                     | CTTCACCTCGGCAACAATTACT  | GGGGAGAATCGCCTGTCAAAC   |
| <i>CK19</i>                     | GATGCTGTTTGGCATGGGCA    | CGTAGATGGGGGTCAGGTCG    |
| <i>NOTCH1</i>                   | TGGACCAGATTGGGGAGTTC    | GCACACTCGTCTGTGTTGAC    |
| <i>NOTCH2</i>                   | CAACCGCAATGGAGGCTATG    | GCGAAGGCACAATCATCAATGTT |
| <i>HES1</i>                     | TCAACACGACACCGGATAAAC   | GCCGCGAGCTATCTTTCTTCA   |
| <i>HEY1</i>                     | GAAGTTGCGCGTTATCTGAGC   | ATGCGAAACCAGTCGAACTCG   |
| <i>SOX9</i>                     | AGCGAACGCACATCAAGAC     | CTGTAGGCGATCTGTTGGGG    |

Supplementary Table 2. Antibodies used for the immunostaining

| Antibody                            | Catlog number   |
|-------------------------------------|-----------------|
| OCT4                                | Abcam: Ab181557 |
| HNF4 $\alpha$                       | Abcam: Ab41898  |
| AFP                                 | Abcam: Ab253704 |
| CK7                                 | Abclonal: A2574 |
| CK19                                | Abclonal: A0247 |
| Notch2                              | Abclonal: A0560 |
| Phalloidin                          | Abcam: Ab176756 |
| Goat-anti rabbit secondary antibody | Abcam: Ab150077 |
| Goat-anti rat secondary antibody    | Abcam: Ab150165 |
